# Supplementary material for: Double-Blind, Placebo-Controlled Study of Bezlotoxumab in Children Receiving Antibacterial Treatment for Clostridioides difficile Infection (MODIFY III)
Source: PubMed Central journal article supplement — J Pediatric Infect Dis Soc. 2023 Jun 30;12(6):334–41. doi: 10.1093/jpids/piad031 (PMC10312293; doi:10.1093/jpids/piad031), 2023-06-30
Supplement: piad031_suppl_supplement_material_3.pdf [file piad031_suppl_supplement_material_3.pdf]

SUPPLEMENT 3. Summary of Baseline Ribotypes<sup>†</sup>

|                                                                                                            | Bezlotoxumab |        | Placebo |        | Total |        |
|------------------------------------------------------------------------------------------------------------|--------------|--------|---------|--------|-------|--------|
|                                                                                                            | n            | (%)    | n       | (%)    | n     | (%)    |
| Participants in population                                                                                 | 104          |        | 35      |        | 139   |        |
| Participants with ribotype assessment                                                                      | 55           | (52.9) | 20      | (57.1) | 75    | (54.0) |
| <b>Summary of Ribotype by descending order</b>                                                             |              |        |         |        |       |        |
| 014                                                                                                        | 8            | (7.7)  | 4       | (11.4) | 12    | (8.6)  |
| 106                                                                                                        | 7            | (6.7)  | 3       | (8.6)  | 10    | (7.2)  |
| 017                                                                                                        | 3            | (2.9)  | 1       | (2.9)  | 4     | (2.9)  |
| 023                                                                                                        | 4            | (3.8)  | 0       | (0.0)  | 4     | (2.9)  |
| 027                                                                                                        | 3            | (2.9)  | 1       | (2.9)  | 4     | (2.9)  |
| 002                                                                                                        | 1            | (1.0)  | 1       | (2.9)  | 2     | (1.4)  |
| 005                                                                                                        | 2            | (1.9)  | 0       | (0.0)  | 2     | (1.4)  |
| 012                                                                                                        | 2            | (1.9)  | 0       | (0.0)  | 2     | (1.4)  |
| 020                                                                                                        | 0            | (0.0)  | 2       | (5.7)  | 2     | (1.4)  |
| 046                                                                                                        | 2            | (1.9)  | 0       | (0.0)  | 2     | (1.4)  |
| 057                                                                                                        | 2            | (1.9)  | 0       | (0.0)  | 2     | (1.4)  |
| 103                                                                                                        | 2            | (1.9)  | 0       | (0.0)  | 2     | (1.4)  |
| 126                                                                                                        | 2            | (1.9)  | 0       | (0.0)  | 2     | (1.4)  |
| 220                                                                                                        | 2            | (1.9)  | 0       | (0.0)  | 2     | (1.4)  |
| 255                                                                                                        | 2            | (1.9)  | 0       | (0.0)  | 2     | (1.4)  |
| 001                                                                                                        | 1            | (1.0)  | 0       | (0.0)  | 1     | (0.7)  |
| 018                                                                                                        | 0            | (0.0)  | 1       | (2.9)  | 1     | (0.7)  |
| 026                                                                                                        | 1            | (1.0)  | 0       | (0.0)  | 1     | (0.7)  |
| 043                                                                                                        | 0            | (0.0)  | 1       | (2.9)  | 1     | (0.7)  |
| 045                                                                                                        | 0            | (0.0)  | 1       | (2.9)  | 1     | (0.7)  |
| 054                                                                                                        | 1            | (1.0)  | 0       | (0.0)  | 1     | (0.7)  |
| 056                                                                                                        | 1            | (1.0)  | 0       | (0.0)  | 1     | (0.7)  |
| 070                                                                                                        | 0            | (0.0)  | 1       | (2.9)  | 1     | (0.7)  |
| 076                                                                                                        | 1            | (1.0)  | 0       | (0.0)  | 1     | (0.7)  |
| 078                                                                                                        | 0            | (0.0)  | 1       | (2.9)  | 1     | (0.7)  |
| 097                                                                                                        | 1            | (1.0)  | 0       | (0.0)  | 1     | (0.7)  |
| 111                                                                                                        | 0            | (0.0)  | 1       | (2.9)  | 1     | (0.7)  |
| 153                                                                                                        | 1            | (1.0)  | 0       | (0.0)  | 1     | (0.7)  |
| 154                                                                                                        | 1            | (1.0)  | 0       | (0.0)  | 1     | (0.7)  |
| 216                                                                                                        | 0            | (0.0)  | 1       | (2.9)  | 1     | (0.7)  |
| 228                                                                                                        | 1            | (1.0)  | 0       | (0.0)  | 1     | (0.7)  |
| 244                                                                                                        | 1            | (1.0)  | 0       | (0.0)  | 1     | (0.7)  |
| 287                                                                                                        | 1            | (1.0)  | 0       | (0.0)  | 1     | (0.7)  |
| 600                                                                                                        | 1            | (1.0)  | 0       | (0.0)  | 1     | (0.7)  |
| 987                                                                                                        | 1            | (1.0)  | 0       | (0.0)  | 1     | (0.7)  |
| 1001                                                                                                       | 0            | (0.0)  | 1       | (2.9)  | 1     | (0.7)  |
| <b>027 Ribotype</b>                                                                                        |              |        |         |        |       |        |
| Yes                                                                                                        | 3            | (2.9)  | 1       | (2.9)  | 4     | (2.9)  |
| No                                                                                                         | 52           | (50.0) | 19      | (54.3) | 71    | (51.1) |
| <b>Hypervirulent strain (027, 078, or 244 ribotypes)</b>                                                   |              |        |         |        |       |        |
| Yes                                                                                                        | 4            | (3.8)  | 2       | (5.7)  | 6     | (4.3)  |
| No                                                                                                         | 51           | (49.0) | 18      | (51.4) | 69    | (49.6) |
| † As determined by polymerase chain reaction. Percentages are based on all participants in the population. |              |        |         |        |       |        |
