# Supplementary material for: Double-Blind, Placebo-Controlled Study of Bezlotoxumab in Children Receiving Antibacterial Treatment for Clostridioides difficile Infection (MODIFY III)
Source: PubMed Central journal article supplement — J Pediatric Infect Dis Soc. 2023 Jun 30;12(6):334–41. doi: 10.1093/jpids/piad031 (PMC10312293; doi:10.1093/jpids/piad031), 2023-06-30
Supplement: piad031_suppl_supplement_material_4.pdf [file piad031_suppl_supplement_material_4.pdf]

SUPPLEMENT 4. Mean susceptibility of *C. difficile* isolates to SOC antibiotics

|                                                                                                                                  | Bezlotoxumab<br>N=104 | Placebo<br>N=35 | Total<br>N=139 |
|----------------------------------------------------------------------------------------------------------------------------------|-----------------------|-----------------|----------------|
| <b>Vancomycin</b>                                                                                                                |                       |                 |                |
| N                                                                                                                                | 55                    | 20              | 75             |
| MIC-50                                                                                                                           | 0.5                   | 0.5             | 0.5            |
| MIC-90                                                                                                                           | 1                     | 0.5             | 1              |
| MIC range                                                                                                                        | 0.12 - 1              | 0.25 - 1        | 0.12 - 1       |
| <b>Metronidazole</b>                                                                                                             |                       |                 |                |
| N                                                                                                                                | 55                    | 20              | 75             |
| MIC-50                                                                                                                           | 0.25                  | 0.25            | 0.25           |
| MIC-90                                                                                                                           | 0.5                   | 0.25            | 0.25           |
| MIC range                                                                                                                        | 0.06 - 4              | 0.06 - 1        | 0.06 - 4       |
| <b>Fidaxomicin</b>                                                                                                               |                       |                 |                |
| N                                                                                                                                | 54                    | 20              | 74             |
| MIC-50                                                                                                                           | 0.5                   | 0.5             | 0.5            |
| MIC-90                                                                                                                           | 0.5                   | 1               | 1              |
| MIC range                                                                                                                        | 0.125 - 1             | 0.06 - 1        | 0.06 - 1       |
| N = number of isolates.<br>MIC = minimum inhibitory concentration (mcg/mL).<br>This table includes baseline susceptibility data. |                       |                 |                |
