# Supplementary material for: Double-Blind, Placebo-Controlled Study of Bezlotoxumab in Children Receiving Antibacterial Treatment for Clostridioides difficile Infection (MODIFY III)
Source: PubMed Central journal article supplement — J Pediatric Infect Dis Soc. 2023 Jun 30;12(6):334–41. doi: 10.1093/jpids/piad031 (PMC10312293; doi:10.1093/jpids/piad031), 2023-06-30
Supplement: piad031_suppl_supplement_material_6.pdf [file piad031_suppl_supplement_material_6.pdf]

**SUPPLEMENT 6: MODIFY III Study Group, Primary and Secondary Investigators**

| <b>Primary Investigator</b>                                                                                | <b>Country</b> | <b>Secondary Investigators</b>                                                                                              |
|------------------------------------------------------------------------------------------------------------|----------------|-----------------------------------------------------------------------------------------------------------------------------|
| Michael Bolton, MD<br>Our Lady of the Lake Hospital<br>Baton Rouge, LA                                     | USA            | Elizabeth McDonough, Adaora Uzodi                                                                                           |
| Jonathan Crews, MD<br>The Children's Hospital of San Antonio<br>San Antonio, TX                            | USA            | Luis Antonio Castagnini, Javier J Monagas                                                                                   |
| Edward J Hoffenberg<br>Children's Hospital - Colorado<br>Aurora, CO                                        | USA            | Edwin De Zoeten, Deborah A Neigut, Thomas Walker                                                                            |
| Kathleen M. Mullane, DO / Madan Kumar<br>University of Chicago<br>Chicago, IL                              | USA            | Randee Estes, Alli Jan, Daniel Corey Johnson,<br>Cheryl Nuss, Stephen Joseph Schrantz,<br>Jill Stetkevych, Jennifer Theusch |
| Michael N. Neely<br>Children's Hospital - Los Angeles<br>Los Angeles, CA                                   | USA            | Vivian Lee, Sonia Michail, Sindhu Mohandas,<br>Kanokporn Mongkolrattanothai                                                 |
| Clarence Buddy Creech<br>Vanderbilt University Medical Center<br>Nashville, TN                             | USA            | Maribeth Ruth Nicholson, Isaac Thomsen                                                                                      |
| Lara Danziger-Isakov<br>Cincinnati Children's Hospital Medical Center<br>Cincinnati, OH                    | USA            | Grant C. Paulsen                                                                                                            |
| Matthew Kelly<br>Duke University Health System<br>Durham, NC                                               | USA            | Jennifer Dougherty, Sarah Heston, Jacob Kilgore,<br>Frances Saccoccio, William J. Steinbach                                 |
| Danielle Zerr<br>Seattle Children's Hospital<br>Seattle, WA                                                | USA            | Matthew Kronman                                                                                                             |
| Thomas Sferra<br>University Hospitals Cleveland Medical Center<br>Cleveland, OH                            | USA            | Maricruz Crespo, Ali Khalili, Kieran McKibben,<br>Jonathan Moses, Sheree Ann White                                          |
| Kwang Sik Kim/Deborah Persaud<br>Johns Hopkins Rubenstein Child Health Building<br>Baltimore, MD           | USA            | Carmelo Cuffari, Dezeray Dutton, Carlton Lee,<br>Suzanne Rubin                                                              |
| Jason Guy Newland, MD<br>Washington University<br>St. Louis, MO                                            | USA            | David A Hunstad, Jason Lake                                                                                                 |
| Norelle Rizkalla-Reilly, MD / Julie Khlevner<br>Columbia University Medical Center/MSCHONY<br>New York, NY | USA            | Amy Defelice                                                                                                                |
| Garrett Zella<br>Tufts Medical Center-Floating Hospital for Children<br>Boston, MA                         | USA            | Khoa D Tran                                                                                                                 |

**SUPPLEMENT 6: MODIFY III Study Group, Primary and Secondary Investigators**

| <b>Primary Investigator</b>                                                                                                         | <b>Country</b> | <b>Secondary Investigators</b>                                                                                                                                                                       |
|-------------------------------------------------------------------------------------------------------------------------------------|----------------|------------------------------------------------------------------------------------------------------------------------------------------------------------------------------------------------------|
| Philip Rosenthal<br>UCSF Medical Center<br>San Francisco, CA                                                                        | USA            | Sara Kathryn Smith, Sofia G Verstraete                                                                                                                                                               |
| Joshua Wolf<br>St. Jude Children's Research Hospital<br>Memphis, TN                                                                 | USA            | Kim J. Allison, Aditya Gaur, Ashleigh Gowen, Hana Hakim, Gabriela Maron, Jennifer Vest                                                                                                               |
| Fabio de Araujo Motta<br>Hospital Pequeno Principe<br>Curitiba, Parana                                                              | Brazil         | Sabine Truppel, Giulia Vilela Silva                                                                                                                                                                  |
| Monica Maria Gomes da Silva<br>Hospital de Clinicas da Universidade Federal do Parana<br>Curitiba, Parana                           | Brazil         | Fernanda Rosa Willrich Gehlen, Mauricio Malaghini Moreira, Eduardo Perondi, Isadora Livia Amazonas Semione, Victor Soares de Oliveira Vaz                                                            |
| Fabianne Altruda de Moraes Costa Carlesse, MD<br>Instituto de Oncologia Pediatrica<br>São Paulo                                     | Brazil         | Adriana Maria Paixao de Souza Silva                                                                                                                                                                  |
| Antonio Tarcisio de Faria Freire, MD<br>Santa Casa de Misericordia de Belo Horizonte<br>Belo Horizonte, Minas Gerais                | Brazil         | Halisson Mesquita Braga, Claudia Murta de Oliveira                                                                                                                                                   |
| Alexandre Vargas Schwarzbald, MD<br>Hospital Universitario da Universidade Federal de Santa Maria<br>Santa Maria, Rio Grande do Sul | Brazil         | Ivo Roberto Dorneles Prola                                                                                                                                                                           |
| Sarbelio Moreno Espinosa<br>Hospital Infantil de Mexico<br>Mexico City                                                              | Mexico         | Martha Josefina Aviles Robles, Ana Gamino Arroyo, Silvieluz George Atriano, Rodolfo Norberto Jimenez Juarez, Sarbelio Moreno Espinosa, Karla Gabriela Ojeda Diezbarroso, Fernando Ortega Riosvelasco |
| Mercedes Macias Parra, MD<br>Instituto Nacional de Pediatria<br>Mexico City                                                         | Mexico         | Giancarlo Hernan Cristerna Tarrasa, Virginia Diaz, Martha Esparza, Marcela Flores Gil, Samia Gaffare Aranda, Amaury Hernan Gonzalez Molina, Salim Kuri Ayala, Francisco Javier Otero Mendoza         |
| Oscar Gonzalez-Llano<br>Hospital Universitario Dr. Jose Eleuterio Gonzalez<br>Monterrey, Nuevo Leon                                 | Mexico         | Julia Esther Colunga Pedraza, Idalia Aracely Cura                                                                                                                                                    |
| Andreas H. Groll, Prof.<br>Universitaetsklinikum Muenster<br>Muenster, Nordrhein-Westfalen                                          | Germany        | Birgit Frohlich, Miriam Antonie Fueller                                                                                                                                                              |
| Uwe Kordes<br>Universitaetsklinikum Hamburg Eppendorf<br>Hamburg                                                                    | Germany        | Matthias Bleeke, Fabian Knoerr, Jun Oh                                                                                                                                                               |

**SUPPLEMENT 6: MODIFY III Study Group, Primary and Secondary Investigators**

| <b>Primary Investigator</b>                                                             | <b>Country</b> | <b>Secondary Investigators</b>                                                                                                                                            |
|-----------------------------------------------------------------------------------------|----------------|---------------------------------------------------------------------------------------------------------------------------------------------------------------------------|
| Heidi Glosli<br>Oslo Universitetssykehus<br>Oslo                                        | Norway         | Ingvild Heier, Karin Holmberg Dahle, Helle Cecilie Pfeiffer, Haavard Ove Skjerven, Aina Aina Ulvmoen, Sean Wallace                                                        |
| Edda Olafsdottir / Camilla Tøndel<br>Haukeland Universitetssykehus<br>Bergen, Hordaland | Norway         | Rune Rose Tronstad                                                                                                                                                        |
| Armando Pinto, MD / Ana Maia Ferreira<br>Instituto Portugues de Oncologia<br>Porto      | Portugal       | Marta Almeida, Vitor Costa, Cristiana Couto, Filipa Leite, Catarina Sousa Macedo, Iris Maia, Tereza Oliva, Silvia Silva, Catia Sousa                                      |
| Alvaro Lassaletta Atienza<br>Hospital Infantil Universitario Nino Jesus<br>Madrid       | Spain          | Francisco Bautista Sirvent, Ana Isabel Benito Bernal, Susana Buendia Lopez, Blanca Herrero Velasco, Lucas Moreno Martin, Alba Rubio San Simón                             |
| Claudia Fortuny Guasch<br>Hospital Universitario Sant Joan de Deu<br>Barcelona          | Spain          | Victoria Fumado, Antoni Noguera Julian, Silvia Simo Nebot                                                                                                                 |
| Palma Solano Paez<br>Hospital Universitario Virgen del Rocio<br>Sevilla, Andalucia      | Spain          | Walter Alfredo Goycochea Valdivia, Jose Ignacio Gutierrez Carrasco, Mercedes Livia Llempén López, Ines Marin Cruz                                                         |
| Ingrid Ora<br>ITCC Barnokologen Astrid Lindgrens Barnsjukhus NKS<br>Stockholm           | Sweden         | Olof Hertting, Anna B Nilsson                                                                                                                                             |
| Torben Ek<br>Barncancercentrum<br>Gothenburg                                            | Sweden         | Jonas Abrahamsson, Magnus Goransson, Lars Kawan, Cecilia Langenskiold, Magnus Sabel                                                                                       |
| Sean O'Riordan<br>Leeds Teaching Hospitals NHS Trust<br>Leeds                           | UK             | Martin Elliott, Adam Wolf Glaser, Danielle Ingham, Rebecca James, Galina Jigoulina, Sally Kinsey, Christopher Lethaby, Robert Philips, Susan Picton, Simone Paige Wilkins |
| Peter Mudry, MD<br>Fakultni Nemocnice Brno Bohunice<br>Brno, Brno-mesto                 | Czech Republic | Tomas Merta, Vaclav Musil                                                                                                                                                 |
| Petr Smisek<br>Klinika detske hematologie a onkologie<br>Praha                          | Czech Republic | Eliska Arltova, Vladimira Jerabkova, Jana Kudrnovska, Eva Pukancikova                                                                                                     |
| Eduardo Lopez<br>Centro Medico Imbanaco<br>Cali, Valle del Cauca                        | Colombia       | Diana Paola Castrillon                                                                                                                                                    |
| Martha Isabel Alvarez<br>Fundacion Cardioinfantil Instituto de Cardiologia<br>Bogota    | Colombia       | Diana Carolina Medina                                                                                                                                                     |

**SUPPLEMENT 6: MODIFY III Study Group, Primary and Secondary Investigators**

| <b>Primary Investigator</b>                                                      | <b>Country</b> | <b>Secondary Investigators</b>                                                    |
|----------------------------------------------------------------------------------|----------------|-----------------------------------------------------------------------------------|
| Claudia Martina Reinoso<br>Fundacion Santa Fe de Bogota<br>Bogota, Cundinamarca  | Colombia       | Juan Carlos Lopez Garcia, Ximena Juliana Monturiol                                |
| Csaba Bereczki<br>SZTE Szent-Gyorgyi Albert Klinikai Kozpont<br>Szeged, Csongrad | Hungary        | Diana Jurdi, Maria Rozsa, Daniel Szucs                                            |
| Gábor Kovács, MD<br>Semmelweis University-II.sz.<br>Budapest                     | Hungary        | Krisztina Bako, Judit Muller, Andras Szabo                                        |
| Krisztina Kalocsai<br>Del-pesti Centrumkorhaz<br>Budapest                        | Hungary        | Tamas Pek                                                                         |
| Ewa Majda-Stanislawska<br>Wojewodzki Specjalistyczny Szpital<br>Lodz, Lodzkie    | Poland         | Gabriela Dlugosz-Mataska, Iwona Sobieraj                                          |
| Jaroslaw Kierkus<br>Instytut Pomnik Centrum<br>Warszawa, Mazowieckie             | Poland         | Monika Meglicka                                                                   |
| Lufuno Rudo Mathivha<br>Chris Hani Baragwanath Academic Hospital<br>Johannesburg | South Africa   | Eduard Bruckmann, Sedima Irene Chueu, Raj Gheevarghese, David Moore, Kuban Naidoo |
| Daniel Rudolf Malan<br>Phoenix Pharma Pty Ltd<br>Port Elizabeth                  | South Africa   | Zelda Erika Punt                                                                  |
| Thahira Jamal Mohamed<br>Hospital Kuala Lumpur<br>Kuala Lumpur                   | Malaysia       | Norshireen Nazli Abdul Razak                                                      |
| Siew Moy Fong<br>Sabah Women's & Children's Hospital<br>Kota Kinabalu, Sabah     | Malaysia       | Sandeep Singh Gill Surindar Singh, Ke Juin Wong                                   |
